# Supplementary material
Source: Springer Nature journal article supplement (https://www.springermedizin.de/resource/supplementary/13229_2011_36_MOESM9_ESM.pdf/9676056)

# Neurexin alpha-1 isoform

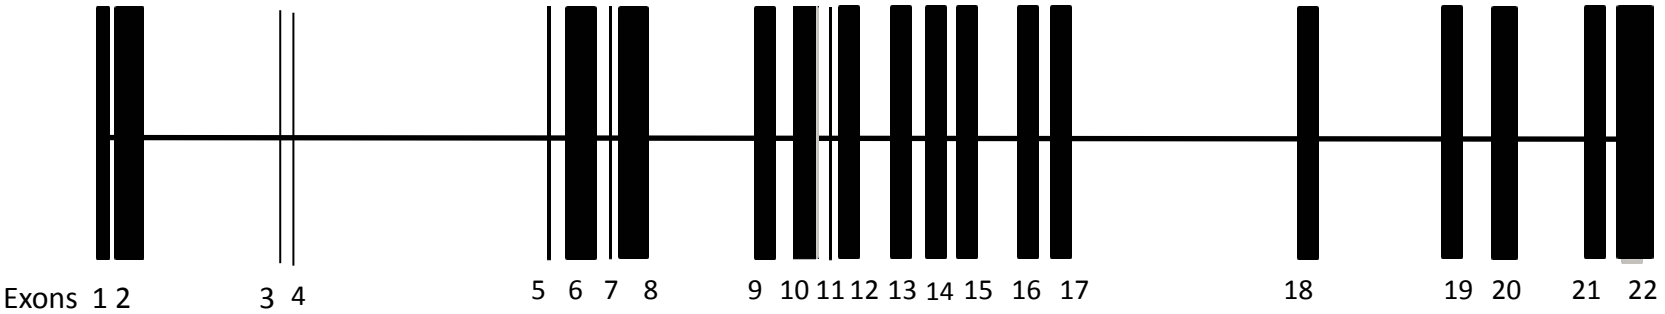

## ASD

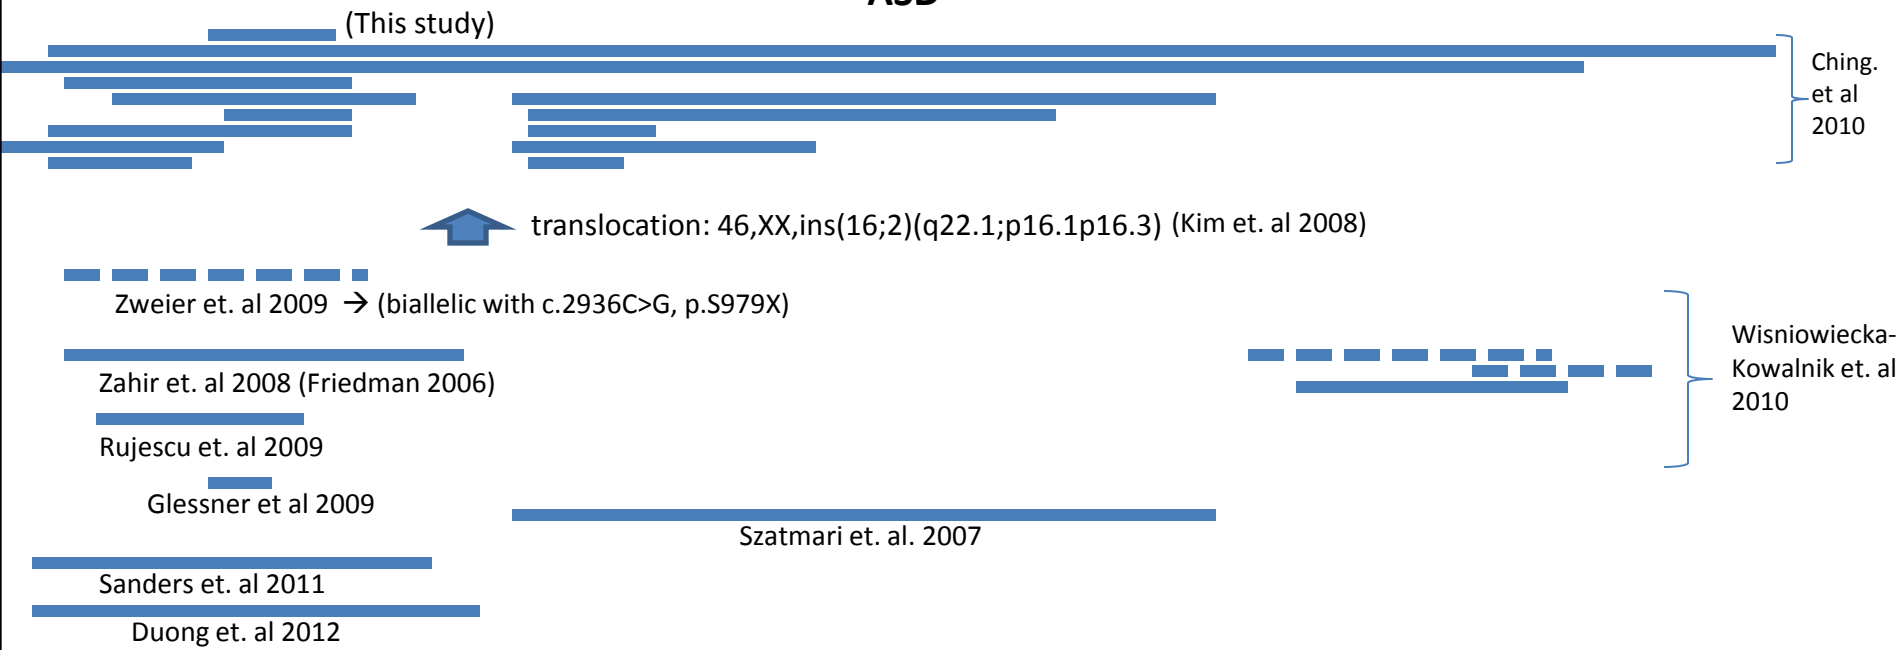

## Mild to Severe Intellectual Disability

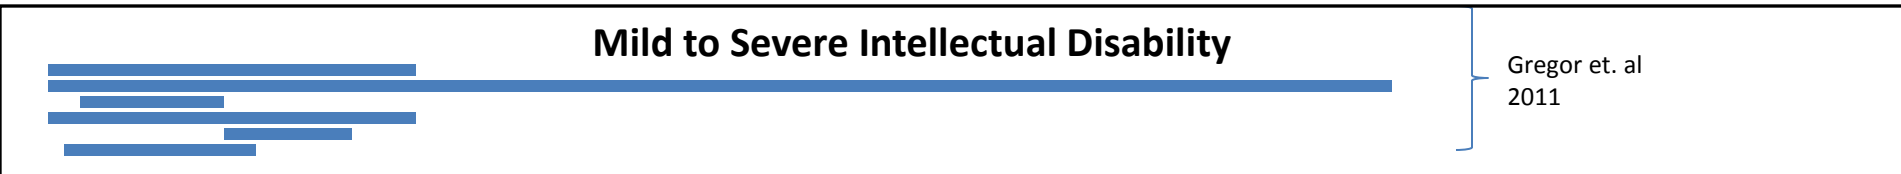

NRXN1 (isoform alpha1)

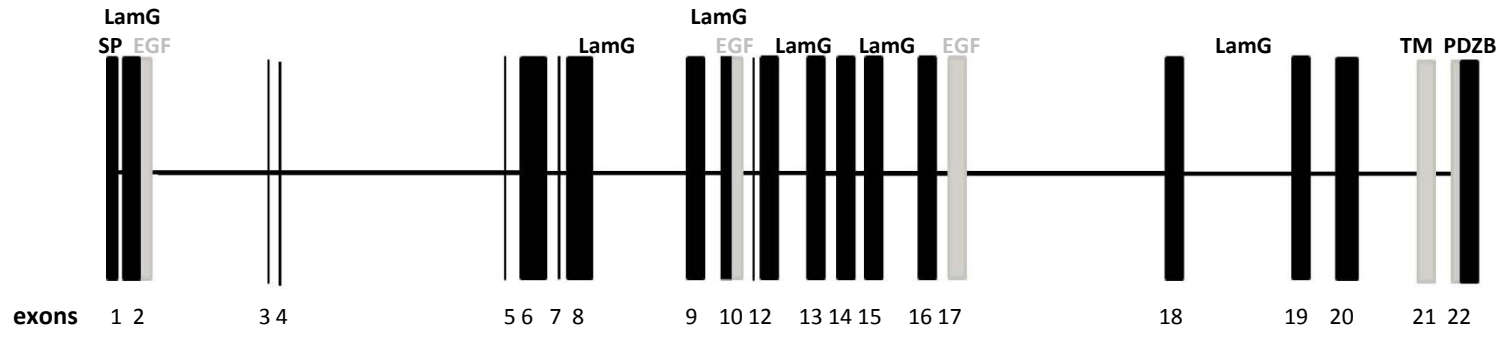

Supplement: MOESM9 [file 9676056]
